# Supplementary material
Source: PubMed Central journal article supplement (PMC5547581)
Supplement: NIHMS889148-supplement-1.pdf [file NIHMS889148-supplement-1.pdf]

## Supplementary Online Content

Ruzicka WB, Subburaju S, Benes FM. Circuit- and diagnosis-specific DNA methylation changes at  $\gamma$ -aminobutyric acid–related genes in postmortem human hippocampus in schizophrenia and bipolar disorder. *JAMA Psychiatry*. Published online March 4, 2015. doi:10.1001/jamapsychiatry.2015.49.

**eTable 1.** Demographic variables

**eTable 2.** Pyrosequencing primers

**eFigure 1.** Laser microdissection of stratum oriens from CA2/3 and CA1

**eFigure 2.** Bisulfite pyrosequencing replication assay results

**eFigure 3.** Assessment of medication effect at the three most significant differentially methylated regions

**eFigure 4.** Assessment of copy number variation at *MSX1*, *DAXX*, and *CCND2*

This supplementary material has been provided by the authors to give readers additional information about their work.

**eTable 1. Demographic variables**

| Diagnosis | Gender | Age   | PMI   | pH   | COD       | Medication Exposures              |
|-----------|--------|-------|-------|------|-----------|-----------------------------------|
| CON       | M      | 57    | 22.3  | 6.19 | Cancer    | Lorazepam                         |
| CON       | F      | 51    | 30.7  | 6.50 | PE        |                                   |
| CON       | F      | 71    | 22.0  | 6.55 | MI        |                                   |
| CON       | F      | 71    | 22.3  | 6.05 | Cancer    |                                   |
| CON       | M      | 88    | 11.1  | 6.18 | Cancer    |                                   |
| CON       | M      | 49    | 27.1  | 6.24 | MI        |                                   |
| CON       | M      | 75    | 20.3  | 6.69 | MI        |                                   |
| CON       | F      | 51    | 23.1  | 6.56 | CVA       |                                   |
|           | 4M 4F  | 64.13 | 22.35 | 6.37 |           |                                   |
| SZ        | F      | 73    | 28.8  | 6.08 | Cancer    | Clozapine, Lithium                |
| SZ        | M      | 77    | 25.3  | 6.14 | PNA       | Clozapine, Quetiapine, Valproate  |
| SZ        | F      | 64    | 18.5  | 6.58 | Resp Fail | Olanzapine, Lorazepam             |
| SZ        | F      | 73    | 24.0  | 6.45 | Cancer    | Risperidone                       |
| SZ        | M      | 83    | 43.5  | 6.08 | Cancer    | Fluphenazine                      |
| SZ        | M      | 56    | 20.0  | 6.52 | MI        | Clozapine                         |
| SZ        | F      | 85    | 12.8  | 6.02 | MI        | Fluphenazine, Haloperidol         |
| SZ        | M      | 32    | 38.4  | 6.27 | Suicide   | Risperidone, Valproate            |
|           | 4M 4F  | 67.88 | 26.42 | 6.27 |           |                                   |
| BD        | F      | 76    | 22.8  | 6.60 | MI        | Lithium, Valproate                |
| BD        | M      | 69    | 29.5  | 6.60 | PNA       | Lithium                           |
| BD        | M      | 77    | 24.2  | 6.13 | Cancer    | Lithium, Diazepam                 |
| BD        | F      | 51    | 30.1  | 6.28 | MI        | Valproate, Risperidone, Diazepam  |
| BD        | M      | 80    | 13.4  | 6.37 | PNA       | Haloperidol, Lithium, Risperidone |
| BD        | F      | 76    | 19.9  | 6.29 | PNA       | Lithium, Olanzapine, Fluphenazine |
| BD        | F      | 51    | 35.1  | 6.41 | PNA       | Clozapine, Lithium, Valproate     |
| BD        | F      | 66    | 25.0  | 6.09 | Suicide   | Olanzapine, Valproate             |
|           | 3M 5F  | 68.25 | 24.98 | 6.35 |           |                                   |
| p         | 0.86   | 0.82  | 0.58  | 0.46 |           |                                   |

Listed are the demographic variables for our assembled cohort. Sample groups were not significantly different for age, gender, or PMI. PMI - postmortem interval, COD - cause of death, CVA – cerebrovascular accident, PE - pulmonary embolism, MI - myocardial infarction, PNA – pneumonia. No cases were included with a documented history of illicit drug use.

**eTable 2.** Pyrosequencing primers

|                        |                                                   |
|------------------------|---------------------------------------------------|
| MSX1 Forward Primer    | 5'- TGT GGA TAG ATG GGA GGT TAT TAA T -3'         |
| MSX1 Reverse Primer    | 5'- /5BiosG/AT CTC CAA AAA ACA CAA AAA ACT AC -3' |
| MSX1 Sequencing Primer | 5'- GTT TTT AAT TTA TAG TT -3'                    |

|                      |                                                    |
|----------------------|----------------------------------------------------|
| FOXG1 Forward Primer | 5'- TTT TGT GTT AAG TTT TTG AAG TTA A -3'          |
| FOXG1 Reverse Primer | 5'- /5BiosG/AA ACA ACA ATT CAA ATC AAC ACT ATC -3' |

|                      |                                                    |
|----------------------|----------------------------------------------------|
| RUNX2 Forward Primer | 5'- TGG AAT TGA TGT AAG GAT ATA TGG TT -3'         |
| RUNX2 Reverse Primer | 5'- /5BiosG/ TT CAA AAC TAA AAA ACC AAA AAA AA -3' |

Listed are primer sequences used for replication analysis by bisulfite pyrosequencing. For the FOXG1 and RUNX2 assays the forward primer was used as the sequencing primer. For all three assays PCR conditions were: 95°C for 15 minutes, (94°C for 30 seconds, 50°C for 30 seconds, 72°C for 30 seconds) for 45 cycles, 72°C for 10 minutes, 4°C hold

**eFigure 1.** Laser microdissection of stratum oriens from CA2/3 and CA1

Before

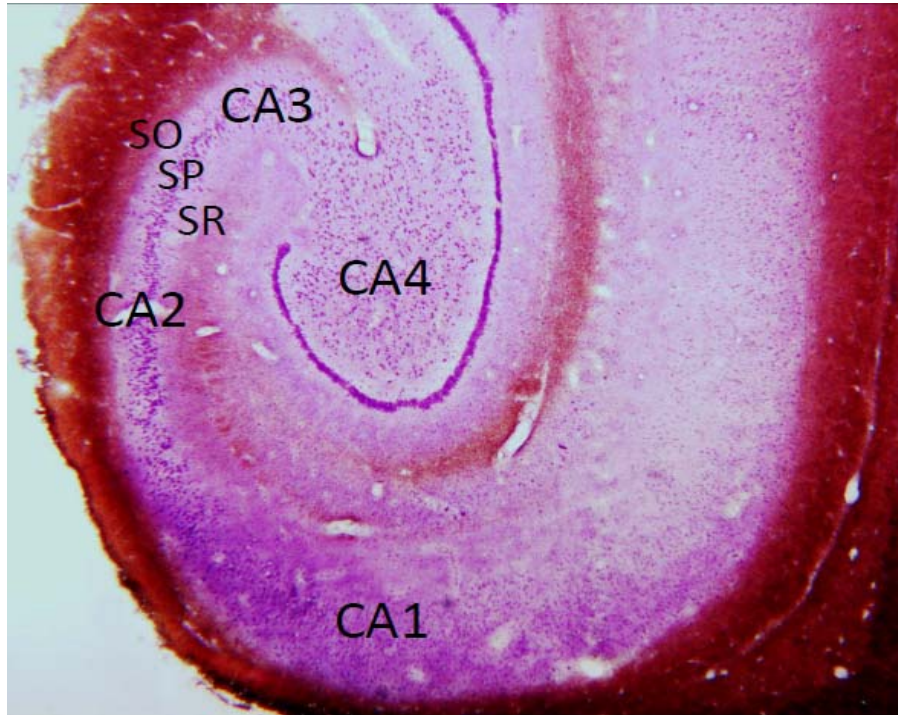

After

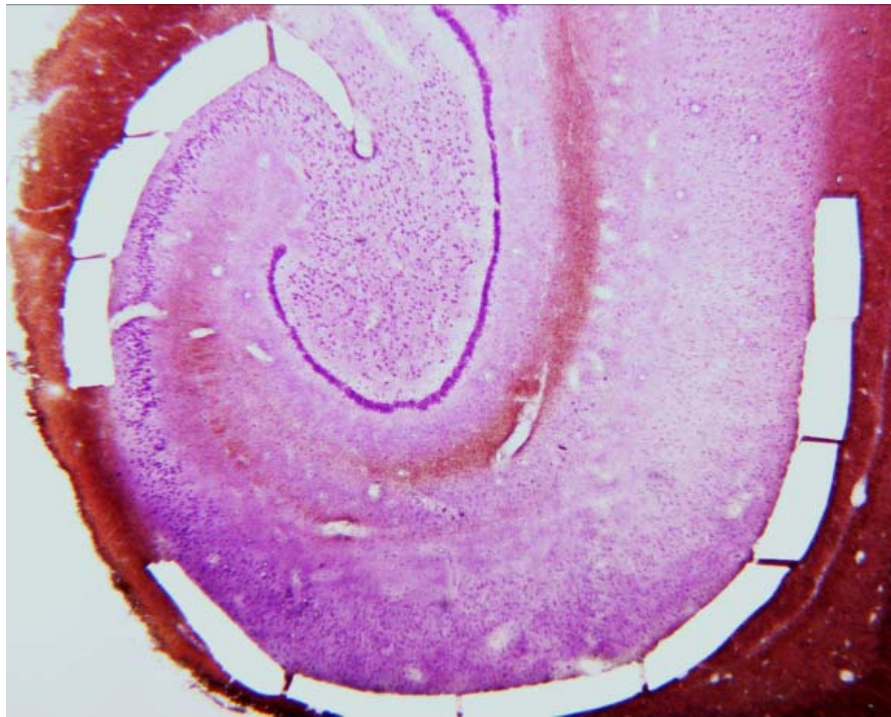

Photomicrographs taken at 4x magnification of a single 30  $\mu$ m section of postmortem human hippocampus before and after laser microdissection of tissue from stratum oriens of subfield CA1 and subfields CA2/3.

© 2015 American Medical Association. All rights reserved.

**eFigure 2.** Bisulfite pyrosequencing replication assay results

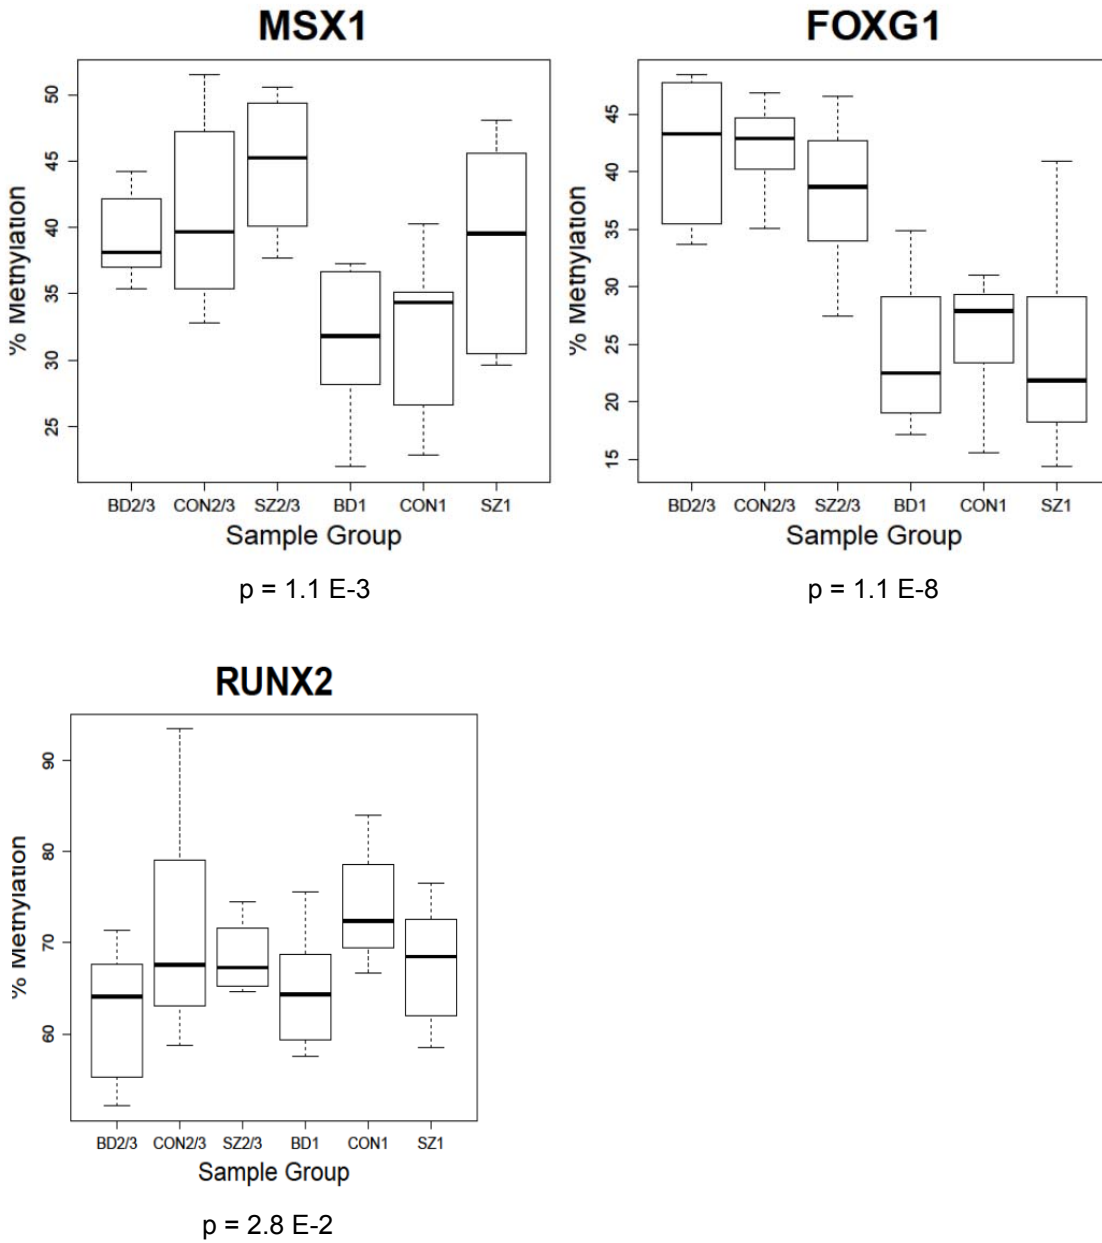

Box plots represent methylation levels measured using pyrosequencing assays with the probes listed in eTable 2.

**eFigure 3.** Assessment of medication effect at the three most significant differentially methylated regions

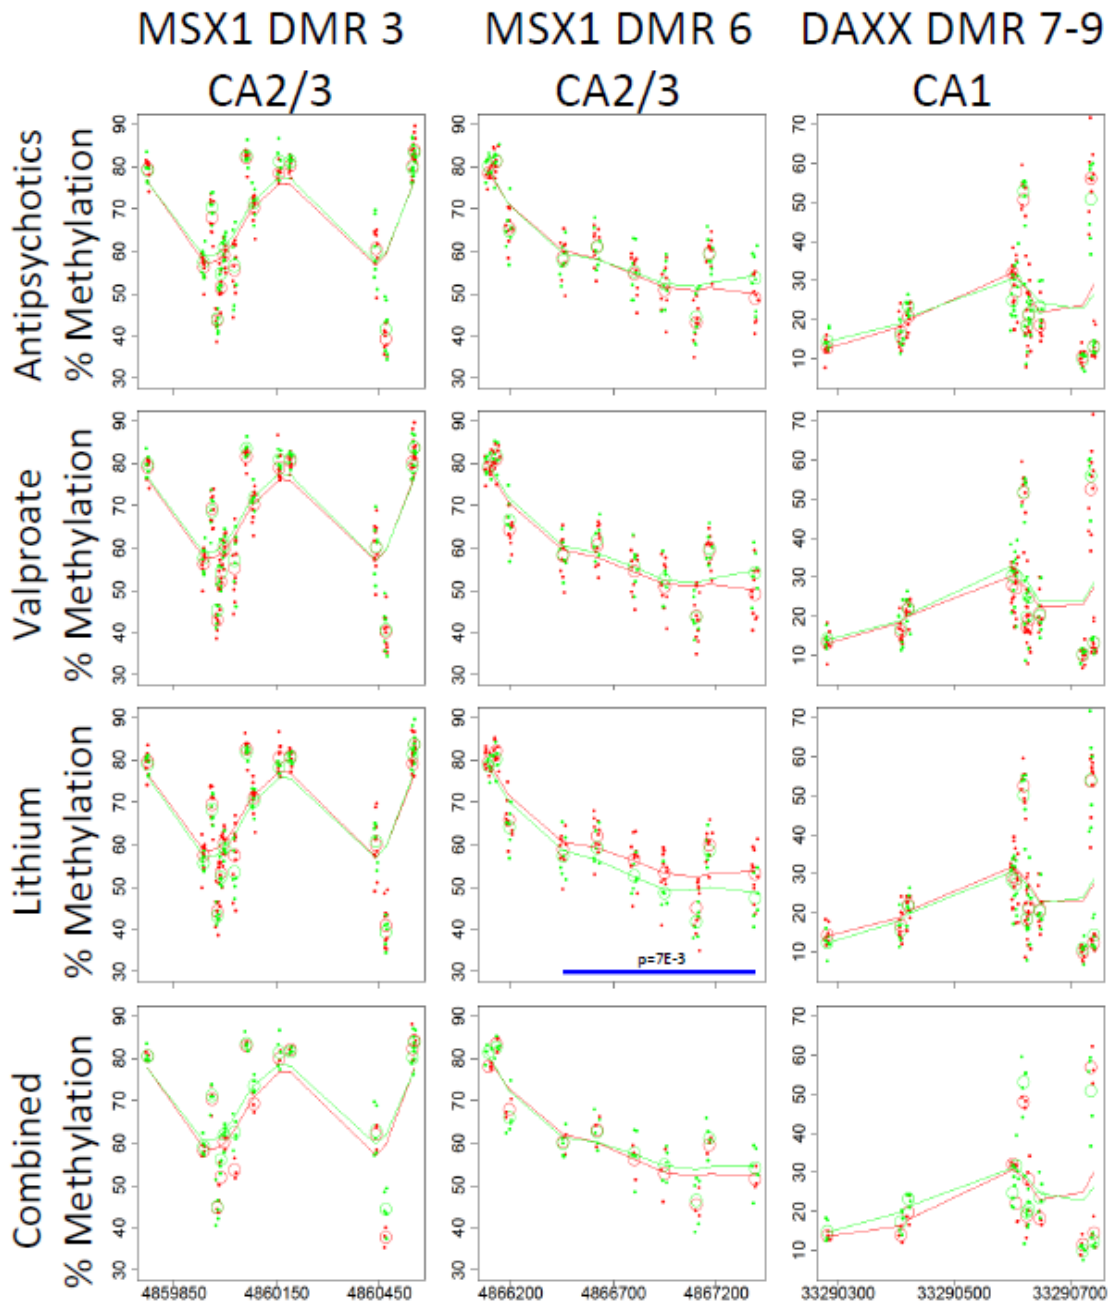

Shown are the methylation levels at the three most significant DMRs in the patient cases (SZ and BD together) from single subfields, separated with those cases exposed to the indicated DMRs medication in green and cases without that exposure in red. Analogous to figure 2, each column represents a single genomic region, and each row represents a single medication exposure comparison. Open circles represent group averages at each measured site, and the smoothed lines represent running group averages. "Antipsychotics" compares cases exposed to dibenzodiazepine-type antipsychotics to those exposed to no or non-dibenzodiazepine-type antipsychotics. In the final row "Combined" refers to combined medication analysis. As only three SZ cases and no BD cases were not exposed to any of the three assessed medication categories, shown are the SZ cases unexposed to any of the three medication categories (red) and the remainder of the SZ cases demonstrating that this subset does not separate from the rest of the group at these genomic locations.

**eFigure 4.** Assessment of copy number variation at *MSX1*, *DAXX*, and *CCND2*

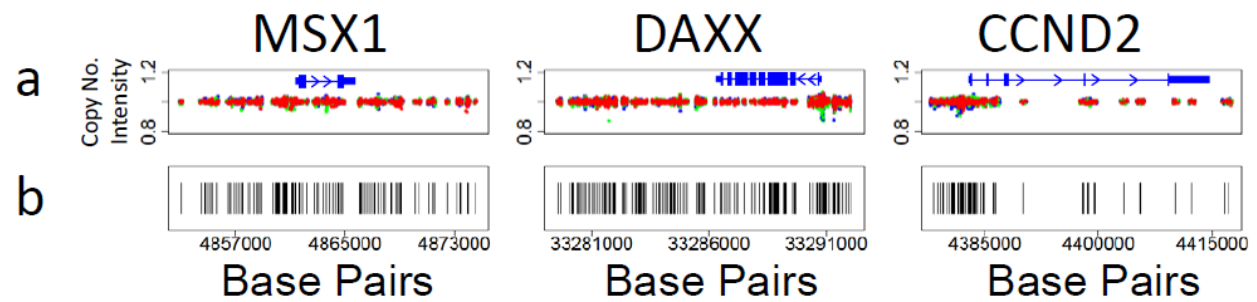

A, Copy number intensity for each probe along the length of the gene, calculated as the total intensity of the methylated and unmethylated channels at each probe for each sample divided by that sum averaged across all samples.<sup>27</sup> The proximity of all values to unity indicates that copy number variation is not a driving factor in our results. B, Vertical bars indicate the genomic position of each probe associated with the gene.
